# Supplementary material for: The advantages of covalently attaching organometallic catalysts to a carbon black support: recyclable Rh(i) complexes that deliver enhanced conversion and product selectivity
Source: Royal Society of Chemistry journal article supplement (doi:10.1039/c5dt00409h), 2015-01-01
Supplement: c5dt00409h1.pdf [file c5dt00409h1.pdf]

Supporting Information for

The advantages of covalently attaching  
organometallic catalysts to a carbon black support:  
Recyclable Rh(I) complexes that deliver enhanced  
conversion and product selectivity

*Andrey A. Tregubov,<sup>a,†</sup> D. Barney Walker,<sup>a,†</sup> Khuong Q. Vuong,<sup>a,b</sup> J. Justin Gooding,<sup>a</sup> and*

*Barbara A. Messerle<sup>a,\*</sup>*

<sup>a</sup> School of Chemistry, The University of New South Wales, Sydney 2052, Australia

<sup>b</sup> Institute of Chemical and Engineering Sciences, 1 Pesek Road, Jurong Island, Singapore 627833

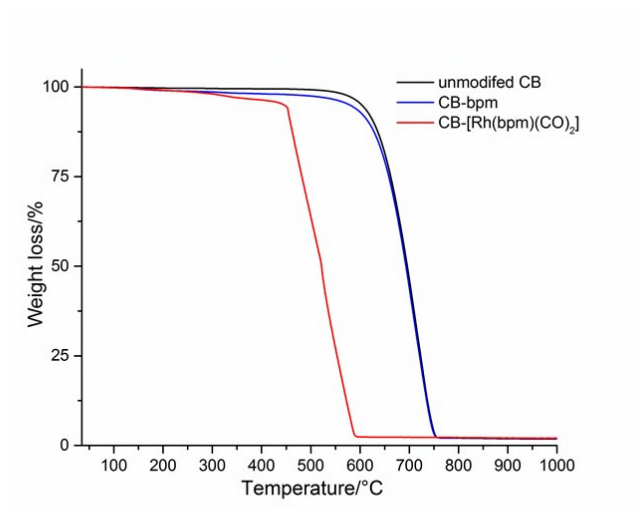

**Figure S1.** TGA curves for unmodified carbon black (CB, black trace), bpm-modified carbon black (CB-bpm, blue trace) and carbon black modified with Rh complex (CB-[Rh(bpm)(CO)<sub>2</sub>], red trace) recorded under an atmosphere of air.

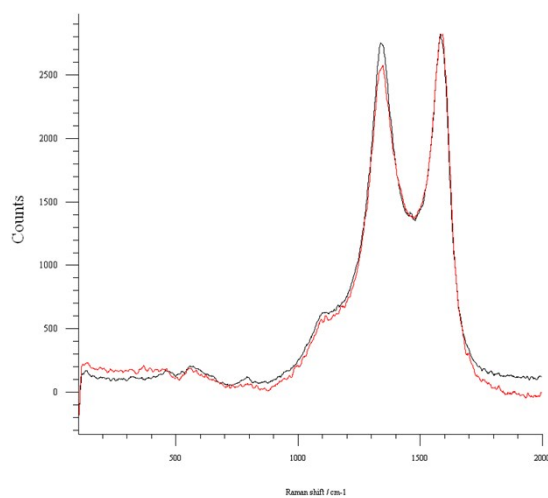

**Figure S2.** Raman spectra of unmodified Vulcan XC-72R (CB, red trace) and CB-[Rh(bpm)(CO)<sub>2</sub>] (black trace).

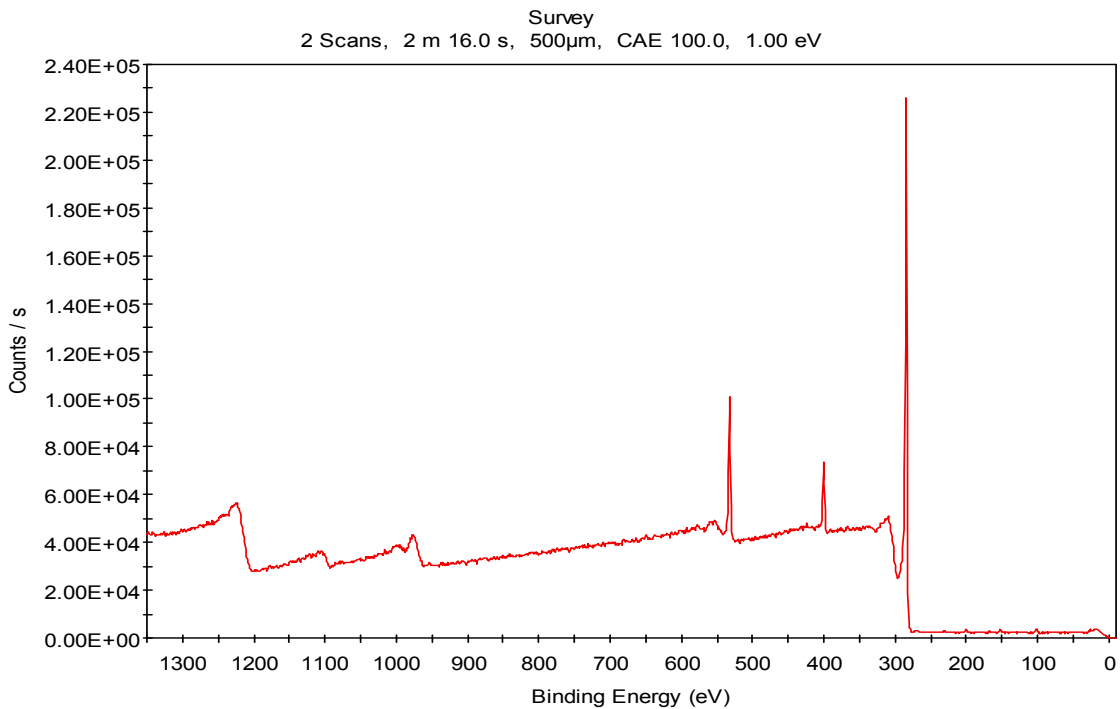

**Figure S3.** XP survey spectrum of GC-bpm.

| Name    | Start BE | Peak BE | End BE | FWHM eV | Area (P) CPS.eV | At. % | SF AI Scof |
|---------|----------|---------|--------|---------|-----------------|-------|------------|
| C1s A   | 291.78   | 284.49  | 281.18 | 0.86    | 31622.8         | 55.07 | 1          |
| C1s B   | 291.78   | 285.74  | 281.18 | 1.73    | 13780.09        | 24    | 1          |
| C1s C   | 291.78   | 287.49  | 281.18 | 1.73    | 1788.56         | 3.12  | 1          |
| C1s D   | 291.78   | 289.06  | 281.18 | 1.73    | 189.63          | 0.33  | 1          |
| Cl2p3 A | 205.08   | 200.21  | 194.74 | 1.22    | 175.19          | 0.2   | 1.51       |
| Cl2p3 B | 205.08   | 197.26  | 194.74 | 1.59    | 70.09           | 0.08  | 1.51       |
| Si2p    | 105.28   | 101.71  | 98.58  | 1.24    | 318.7           | 0.67  | 0.817      |
| N1s A   | 405.23   | 401.25  | 396.18 | 1.53    | 3469.17         | 3.4   | 1.8        |
| N1s B   | 405.23   | 399.82  | 396.18 | 1.53    | 3966.46         | 3.88  | 1.8        |
| O1s     | 537.48   | 532.64  | 527.38 | 2.14    | 14897.21        | 9.12  | 2.93       |
| S2p3 A  | 173.18   | 167.8   | 165.18 | 1.9     | 88.74           | 0.14  | 1.11       |

**Table S1.** Peak table for the XP survey spectrum of GC-bpm.



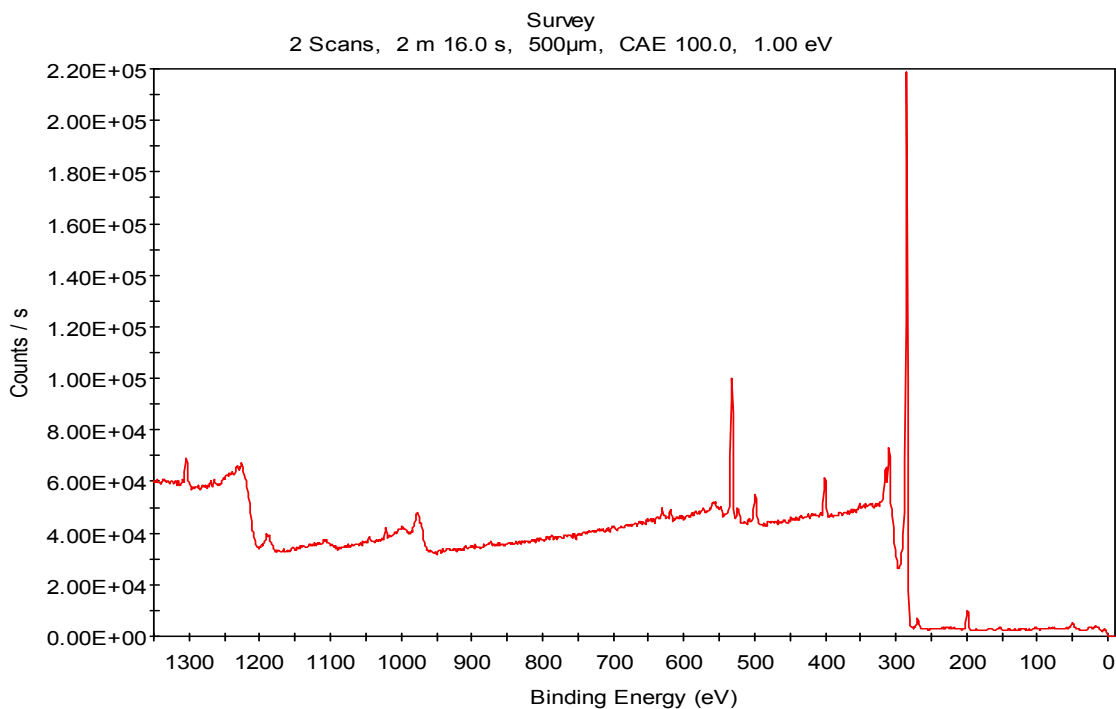

**Figure S4.** XP survey spectrum of GC-[Rh(bpm)(CO)<sub>2</sub>].

| Name           | Start BE | Peak BE | End BE  | FWHM eV | Area (P) CPS.eV | At. % | SF AI Scof |
|----------------|----------|---------|---------|---------|-----------------|-------|------------|
| <b>C1s A</b>   | 294.28   | 284.44  | 281.98  | 0.75    | 19311.46        | 37.27 | 1          |
| <b>C1s B</b>   | 294.28   | 284.94  | 281.98  | 1.54    | 15854.33        | 30.6  | 1          |
| <b>C1s C</b>   | 294.28   | 285.94  | 281.98  | 1.54    | 1621.1          | 3.13  | 1          |
| <b>C1s D</b>   | 294.28   | 286.54  | 281.98  | 1.54    | 3584.25         | 6.92  | 1          |
| <b>C1s E</b>   | 294.28   | 287.94  | 281.98  | 1.54    | 1451.21         | 2.8   | 1          |
| <b>C1s F</b>   | 294.28   | 289.14  | 281.98  | 1.54    | 480.44          | 0.93  | 1          |
| <b>C1s G</b>   | 294.28   | 290.76  | 281.98  | 2.89    | 1499.54         | 2.9   | 1          |
| <b>Cl2p3 A</b> | 203.78   | 198.17  | 193.98  | 1.41    | 900.31          | 1.14  | 1.51       |
| <b>Cl2p3 B</b> | 203.78   | 200.05  | 193.98  | 1.64    | 209.97          | 0.27  | 1.51       |
| <b>N1s A</b>   | 404.41   | 401.45  | 396.78  | 1.73    | 2174.26         | 2.36  | 1.8        |
| <b>N1s B</b>   | 404.41   | 399.93  | 396.78  | 1.73    | 1274.38         | 1.38  | 1.8        |
| <b>O1s A</b>   | 537.68   | 532.35  | 528.68  | 2.63    | 12867.49        | 8.73  | 2.93       |
| <b>Rh3d5 A</b> | 318.89   | 310.08  | 307.37  | 1.91    | 4322.15         | 1     | 8.39       |
| <b>Zn2p3 A</b> | 1025.18  | 1022.13 | 1017.48 | 1.84    | 899.94          | 0.11  | 18.92      |
| <b>Si2p A</b>  | 106.09   | 101.81  | 98.28   | 1.35    | 166.7           | 0.39  | 0.817      |
| <b>I3d5 A</b>  | 635.78   | 619.4   | 615.58  | 1.77    | 794.98          | 0.08  | 19.87      |

**Table S2.** Peak table for the XP survey spectrum of GC-[Rh(bpm)(CO)<sub>2</sub>].

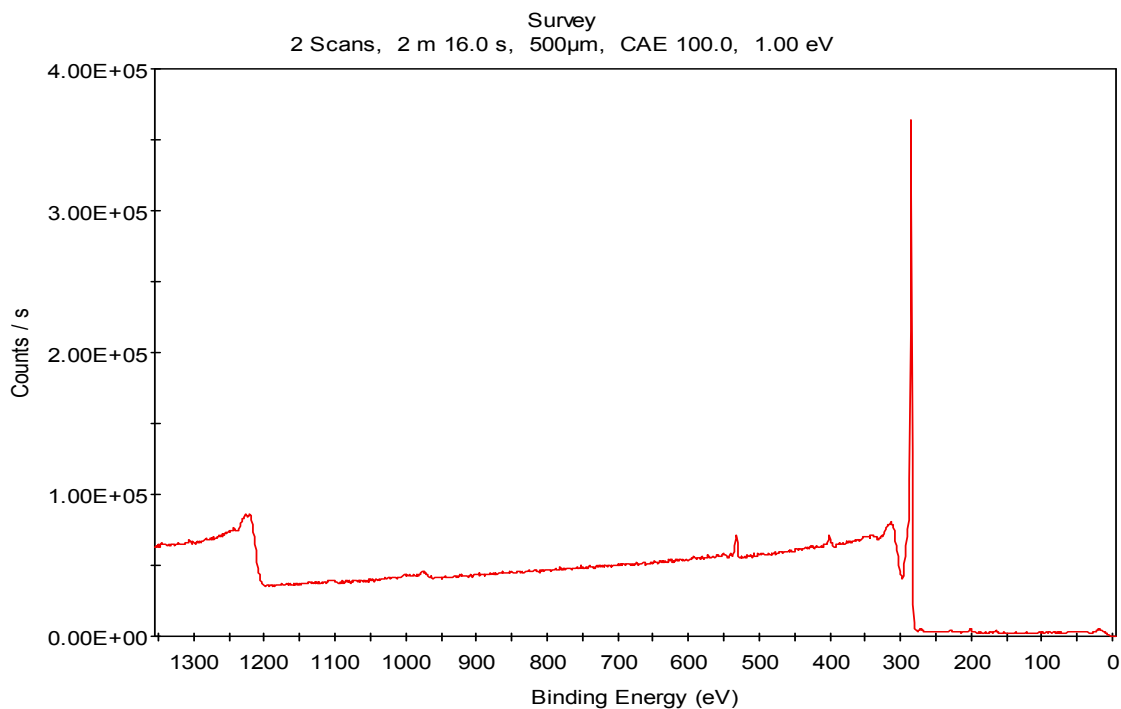

**Figure S5.** XP survey spectrum of CB-bpm.

| Name           | Start BE | Peak BE | End BE | FWHM eV | Area (P) CPS.eV | At. % | SF Al Scof |
|----------------|----------|---------|--------|---------|-----------------|-------|------------|
| <b>C1s A</b>   | 294.98   | 284.53  | 281.38 | 0.78    | 35165.95        | 45.94 | 1          |
| <b>C1s B</b>   | 294.98   | 285.03  | 281.38 | 1.64    | 22138.2         | 28.92 | 1          |
| <b>C1s C</b>   | 294.98   | 286.63  | 281.38 | 1.64    | 4835.52         | 6.32  | 1          |
| <b>C1s D</b>   | 294.98   | 288.03  | 281.38 | 1.64    | 2382.84         | 3.11  | 1          |
| <b>C1s E</b>   | 294.98   | 289.23  | 281.38 | 1.64    | 667.32          | 0.87  | 1          |
| <b>C1s F</b>   | 294.98   | 290.74  | 281.38 | 3.32    | 6469.56         | 8.46  | 1          |
| <b>C1s G</b>   | 294.98   | 283.75  | 281.38 | 0.78    | 2525.77         | 3.3   | 1          |
| <b>Cl2p3 A</b> | 205.98   | 200.51  | 197.38 | 1.18    | 320.51          | 0.28  | 1.51       |
| <b>N1s A</b>   | 403.98   | 399.65  | 396.78 | 1.33    | 710.43          | 0.52  | 1.8        |
| <b>N1s B</b>   | 403.98   | 401.15  | 396.78 | 1.33    | 680.91          | 0.5   | 1.8        |
| <b>O1s A</b>   | 536.98   | 531.76  | 528.58 | 2.05    | 1510.71         | 0.69  | 2.93       |
| <b>O1s B</b>   | 536.98   | 533.01  | 528.58 | 2.05    | 1913.88         | 0.88  | 2.93       |
| <b>S2p3 A</b>  | 167.38   | 163.9   | 161.78 | 0.9     | 182.85          | 0.21  | 1.11       |

**Table S3.** Peak table for the XP survey spectrum of CB-bpm

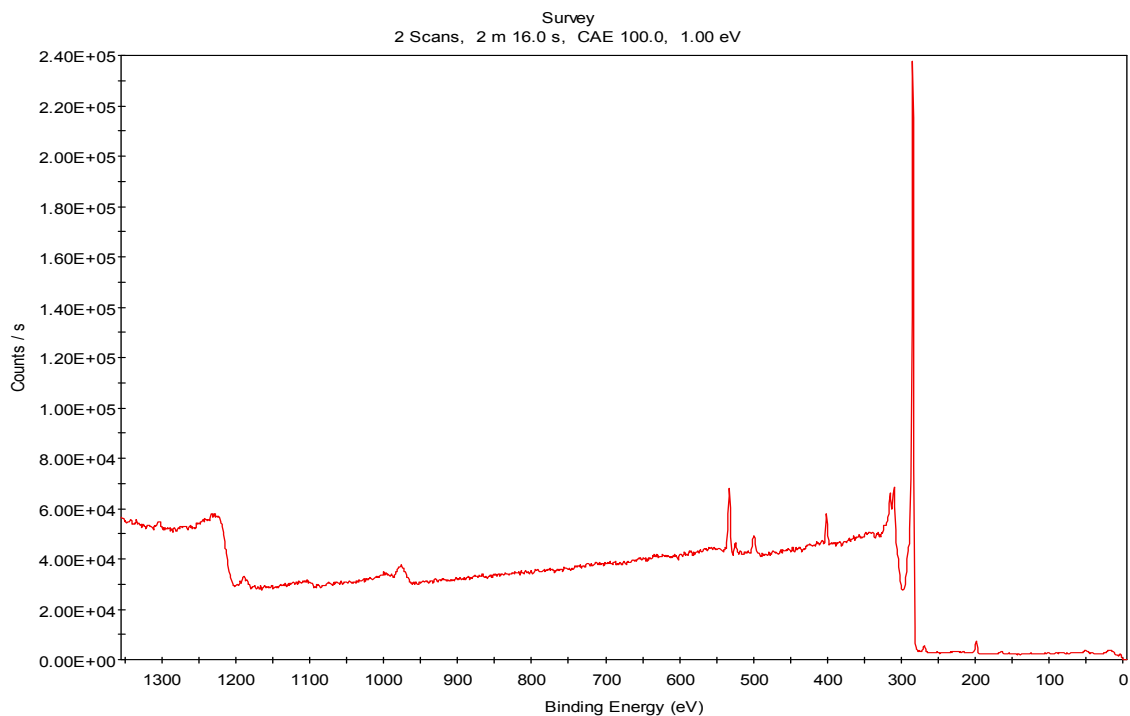

**Figure S6.** XP survey spectrum of CB-[Rh(bpm)(CO)<sub>2</sub>].

| Name           | Start BE | Peak BE | End BE | FWHM eV | Area (P) CPS.eV | At. % | SF Al Scof |
|----------------|----------|---------|--------|---------|-----------------|-------|------------|
| <b>C1s A</b>   | 292.38   | 284.43  | 281.08 | 0.88    | 29916.07        | 51.33 | 1          |
| <b>C1s B</b>   | 292.38   | 284.95  | 281.08 | 1.54    | 15342.41        | 26.33 | 1          |
| <b>C1s C</b>   | 292.38   | 285.95  | 281.08 | 1.54    | 2315.01         | 3.97  | 1          |
| <b>C1s D</b>   | 292.38   | 286.55  | 281.08 | 1.54    | 2141.77         | 3.68  | 1          |
| <b>C1s E</b>   | 292.38   | 287.95  | 281.08 | 1.54    | 1008            | 1.73  | 1          |
| <b>C1s F</b>   | 292.38   | 289.15  | 281.08 | 1.54    | 709.94          | 1.22  | 1          |
| <b>C1s G</b>   | 292.38   | 290.74  | 281.08 | 1.81    | 1011.91         | 1.74  | 1          |
| <b>Cl2p3 A</b> | 204.08   | 198.06  | 195.22 | 1.42    | 693.4           | 0.78  | 1.51       |
| <b>Cl2p3 B</b> | 204.08   | 199.84  | 195.22 | 1.42    | 150.03          | 0.17  | 1.51       |
| <b>N1s A</b>   | 404.93   | 399.98  | 394.88 | 1.77    | 841.67          | 0.81  | 1.8        |
| <b>N1s B</b>   | 404.93   | 401.47  | 394.88 | 1.77    | 2110.78         | 2.04  | 1.8        |
| <b>O1s</b>     | 539.05   | 532.08  | 527.08 | 2.54    | 7931.73         | 4.78  | 2.93       |
| <b>Rh3d5 A</b> | 317.9    | 310.16  | 305.91 | 1.73    | 4930.41         | 1.01  | 8.39       |
| <b>Rh3d5 B</b> | 317.9    | 308.1   | 305.91 | 1.73    | 1002.23         | 0.21  | 8.39       |
| <b>S2p3 A</b>  | 167.77   | 163.78  | 161.08 | 0.88    | 137.38          | 0.21  | 1.11       |

**Table S4.** Peak table for the XP survey spectrum of CB-[Rh(bpm)(CO)<sub>2</sub>].

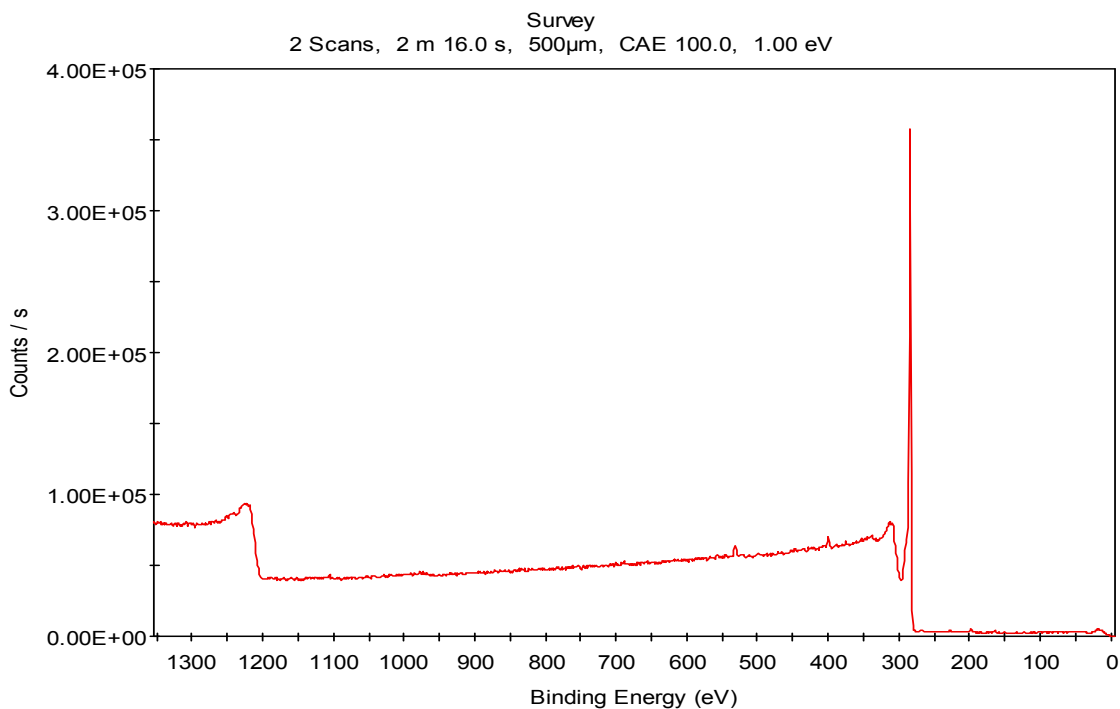

**Figure S7.** XP survey spectrum of CB-[Rh(bpm)(CO)<sub>2</sub>] after 2 catalytic cycles.

| Name    | Start BE | Peak BE | End BE | FWHM eV | Area (P) CPS.eV | At. % | SF AI Scof |
|---------|----------|---------|--------|---------|-----------------|-------|------------|
| C1s A   | 294.28   | 284.49  | 281.98 | 0.87    | 40571.99        | 47.63 | 1          |
| C1s B   | 294.28   | 284.99  | 281.98 | 1.54    | 26313.47        | 30.89 | 1          |
| C1s C   | 294.28   | 285.99  | 281.98 | 1.54    | 2128.84         | 2.5   | 1          |
| C1s D   | 294.28   | 286.59  | 281.98 | 1.54    | 4871.43         | 5.72  | 1          |
| C1s E   | 294.28   | 287.99  | 281.98 | 1.54    | 2259.64         | 2.65  | 1          |
| C1s F   | 294.28   | 289.19  | 281.98 | 1.54    | 1196.74         | 1.41  | 1          |
| C1s G   | 294.28   | 290.91  | 281.98 | 2.65    | 5134.27         | 6.03  | 1          |
| Cl2p3 A | 203.78   | 198.04  | 193.98 | 1.51    | 382.61          | 0.3   | 1.51       |
| Cl2p3 B | 203.78   | 200.59  | 193.98 | 1.59    | 63.44           | 0.05  | 1.51       |
| N1s A   | 404.41   | 401.49  | 396.78 | 1.73    | 757.81          | 0.5   | 1.8        |
| N1s B   | 404.41   | 400.02  | 396.78 | 1.73    | 1202.94         | 0.79  | 1.8        |
| O1s A   | 539.18   | 532.53  | 528.16 | 2.77    | 2446.18         | 1.01  | 2.93       |
| S2p3 A  | 167.88   | 163.87  | 160.83 | 0.9     | 196.4           | 0.21  | 1.11       |
| Rh3d5 A | 317.68   | 310.07  | 307.88 | 2.51    | 2307.6          | 0.32  | 8.39       |

**Table S5.** Peak table for the XP survey spectrum of CB-[Rh(bpm)(CO)<sub>2</sub>] after 2 catalytic cycles.



| Entry | Catalyzed reaction                                                                | Catalytic run                                                                     | Catalyst sample weight, mg | [Rh], mg/L | Rh, wt % |
|-------|-----------------------------------------------------------------------------------|-----------------------------------------------------------------------------------|----------------------------|------------|----------|
| 1     | N/A                                                                               | 0                                                                                 | 42.2                       | 16.90      | 1.00     |
| 2     | 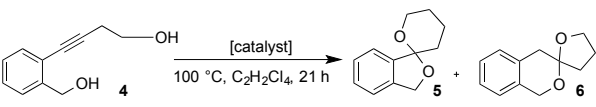 | 1                                                                                 | 2.5                        | 0.90       | 0.90     |
| 3     |                                                                                   | 2                                                                                 | 1.7                        | 0.59       | 0.88     |
| 4     |                                                                                   | 3                                                                                 | 2.1                        | 0.71       | 0.85     |
| 5     |                                                                                   | 4                                                                                 | 1.3                        | 0.43       | 0.83     |
| 6     |                                                                                   |  | 1                          | 2.0        | 0.73     |
| 7     | 2                                                                                 |                                                                                   | 2.2                        | 0.77       | 0.88     |
| 8     | 3                                                                                 |                                                                                   | 1.9                        | 0.64       | 0.85     |
| 9     | 4                                                                                 |                                                                                   | 2.3                        | 0.76       | 0.83     |

**Table S6.** Summary of ICP-MS analysis of catalyst samples recovered after completion of every catalytic run

Example of calculation for entry 1:

$$m_{\text{Rh}} = 16.9 \text{ mg/L} \times 0.025 \text{ L} = 0.4225 \text{ mg};$$

$$\text{Rh wt \%} = (0.4225/42.2) \times 100\% = 1.0 \text{ \%}.$$

| Entry | Catalyzed reaction | Catalytic run | [Rh], mg/L | Rh, wt % |
|-------|--------------------|---------------|------------|----------|
| 1     |                    | 1             | 1.87       | 9.1      |
| 2     |                    | 2             | 0.42       | 2.0      |
| 3     |                    | 3             | 0.47       | 2.3      |
| 4     |                    | 4             | 0.44       | 2.1      |
| 5     |                    | 1             | 1.77       | 8.8      |
| 6     |                    | 2             | 0.41       | 2.0      |
| 7     |                    | 3             | 0.46       | 2.3      |
| 8     |                    | 4             | 0.48       | 2.4      |

**Table S7.** Summary of ICP-MS analysis of residues obtained after evaporation of mother liquors recovered after completion of every catalytic run.

Example of calculation for entry 5

$$m_{\text{Rh}} = 1.77 \text{ mg/L} \times 0.025 \text{ L} = 0.04425 \text{ mg};$$

$$\text{Rh wt \%} = [(0.04425 \text{ mg}) / (50.0 \text{ mg} \times 0.01)] \times 100\% = 8.8 \%$$

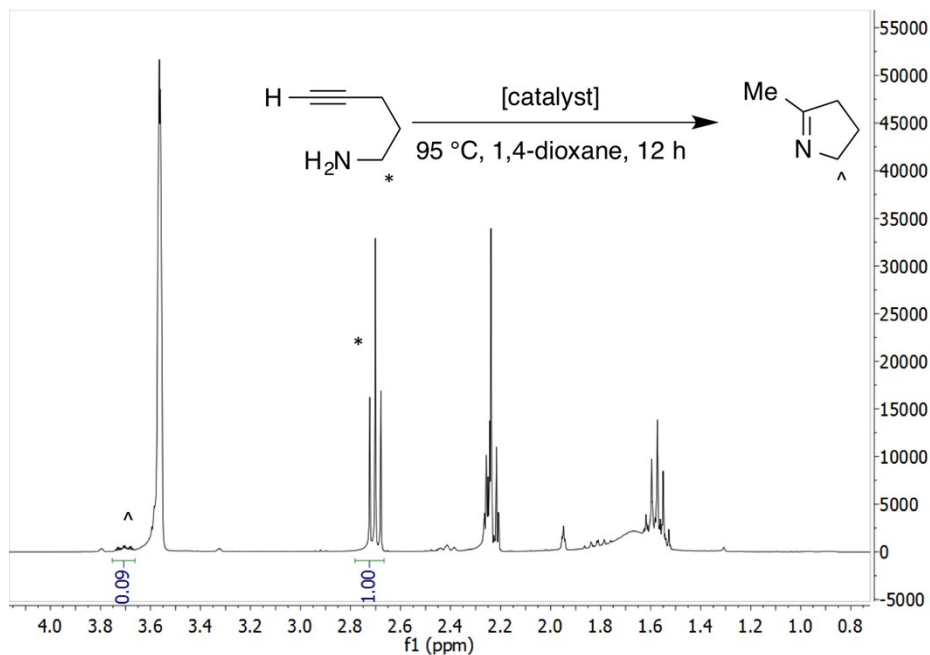

**Figure S8.** <sup>1</sup>H NMR spectrum of the residues recovered after completion of hydroamination of pent-4-yn-1-amine using CB-[Rh(bpm)(CO)<sub>2</sub>] (table 1, entry 1).

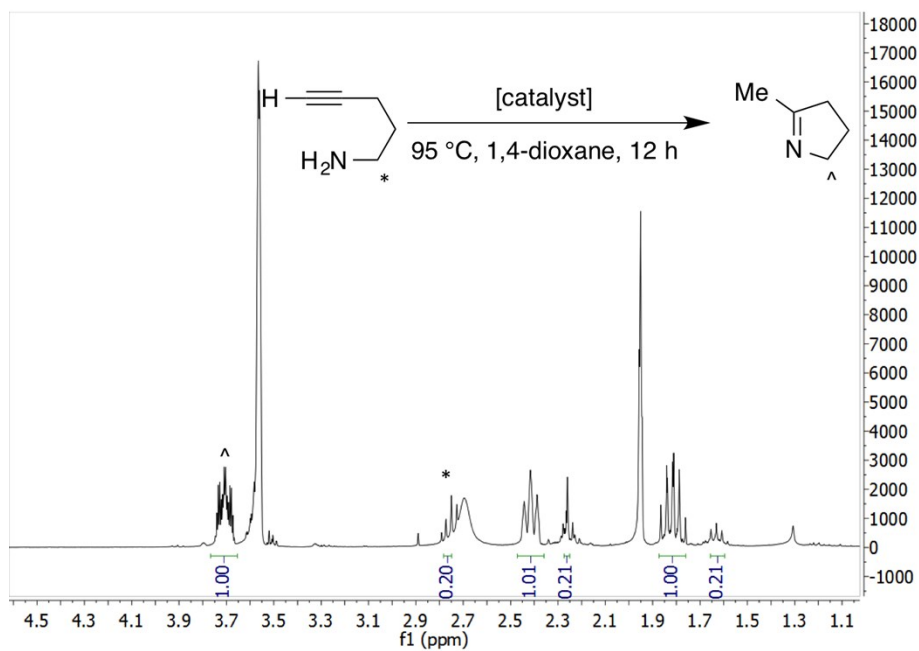

**Figure S9** <sup>1</sup>H NMR spectrum of the residues recovered after completion of hydroamination of pent-4-yn-1-amine using CB-[Rh(bpm)(CO)<sub>2</sub>] (table 1, entry 2).

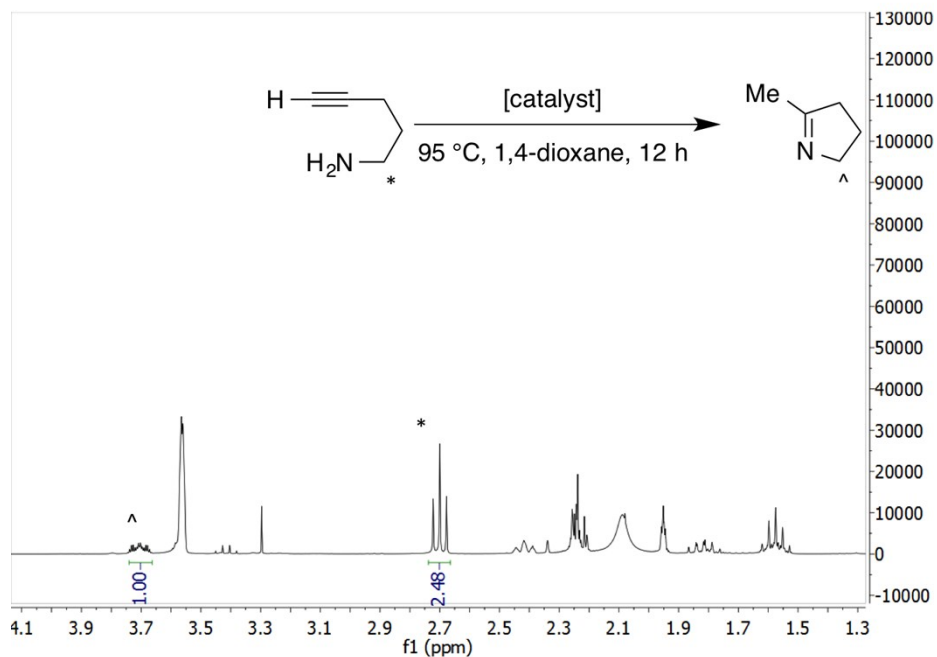

**Figure S10.**  $^1\text{H}$  NMR spectrum of the residues recovered after completion of hydroamination of pent-4-yn-1-amine using  $\text{CB-}[\text{Rh}(\text{bpm})(\text{CO})_2]$  (table 1, entry 4).

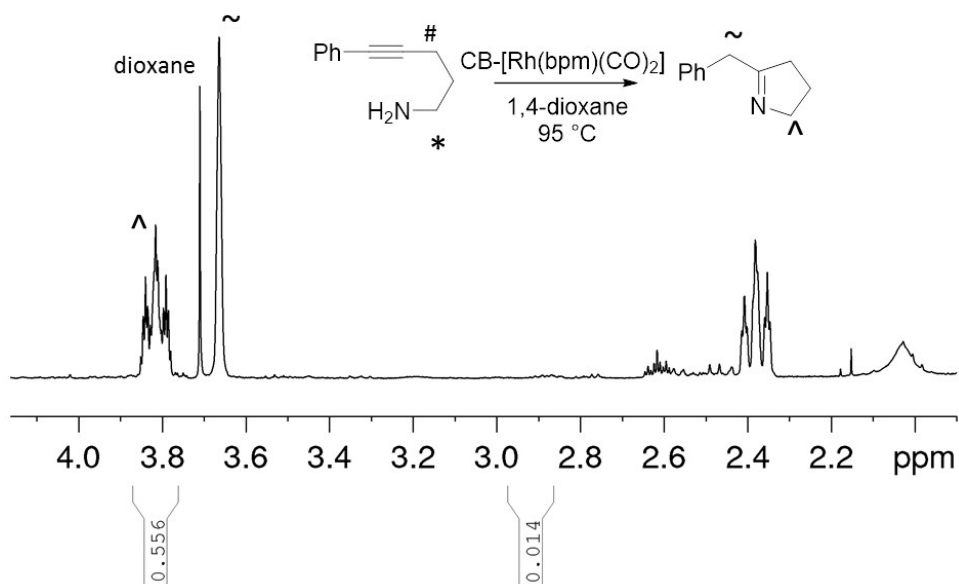

**Figure S11.**  $^1\text{H}$  NMR spectrum of the residues recovered after completion of the first run of hydroamination of 5-phenyl-4-pentyn-1-amine using  $\text{CB-}[\text{Rh}(\text{bpm})(\text{CO})_2]$  as a catalyst (Table 1, entry 7)

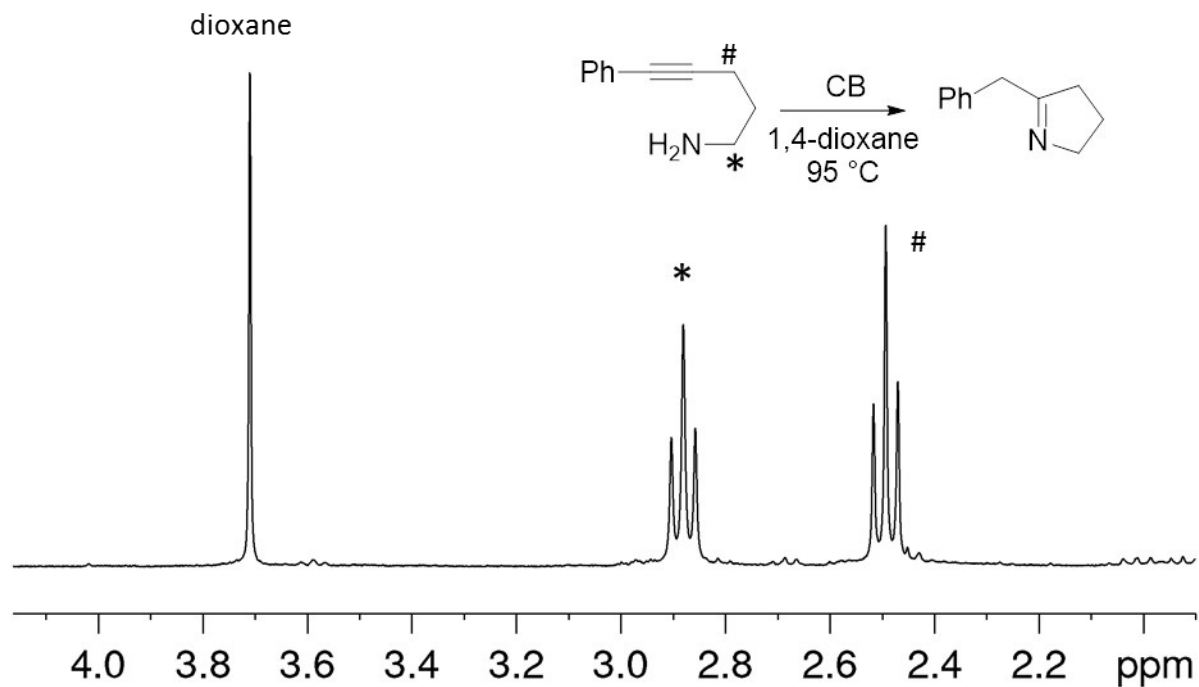

**Figure S12.**  $^1\text{H}$  NMR spectrum of the residues recovered after completion of hydroamination of 5-phenyl-4-pentyn-1-amine using unmodified carbon black as a catalyst (table 1, entry 8).

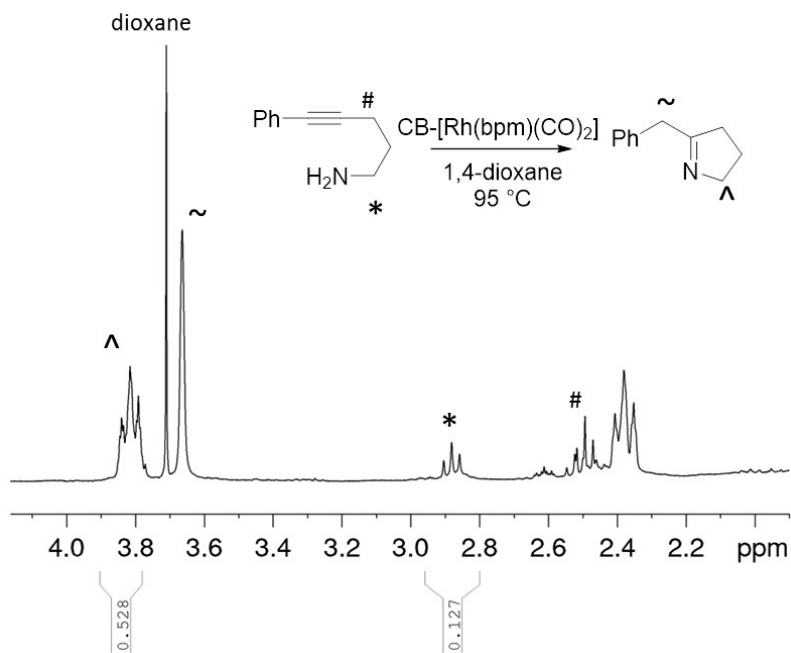

**Figure S13.**  $^1\text{H}$  NMR spectrum of the residues recovered after completion of the second run of hydroamination of 5-phenyl-4-pentyn-1-amine using  $\text{CB}[\text{Rh}(\text{bpm})(\text{CO})_2]$  as a catalyst (Table 2, entry 2).

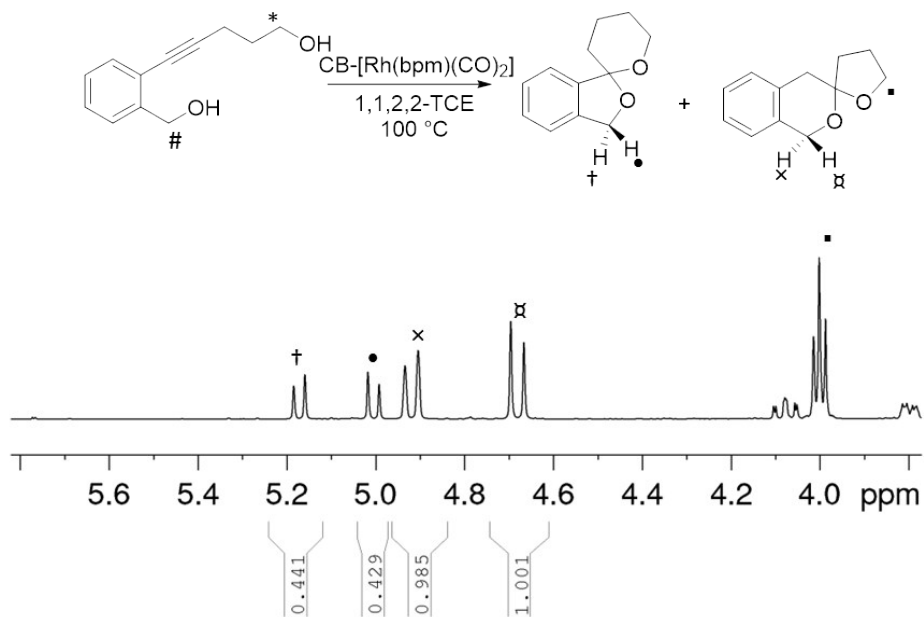

**Figure S14.**  $^1\text{H}$  NMR spectrum of the compounds recovered after completion of the first run of hydroalkoxylation of 2-(5-hydroxypent-1-ynyl)benzyl alcohol using  $\text{CB}[\text{Rh}(\text{bpm})(\text{CO})_2]$  as a catalyst (Table 3, entry 2).

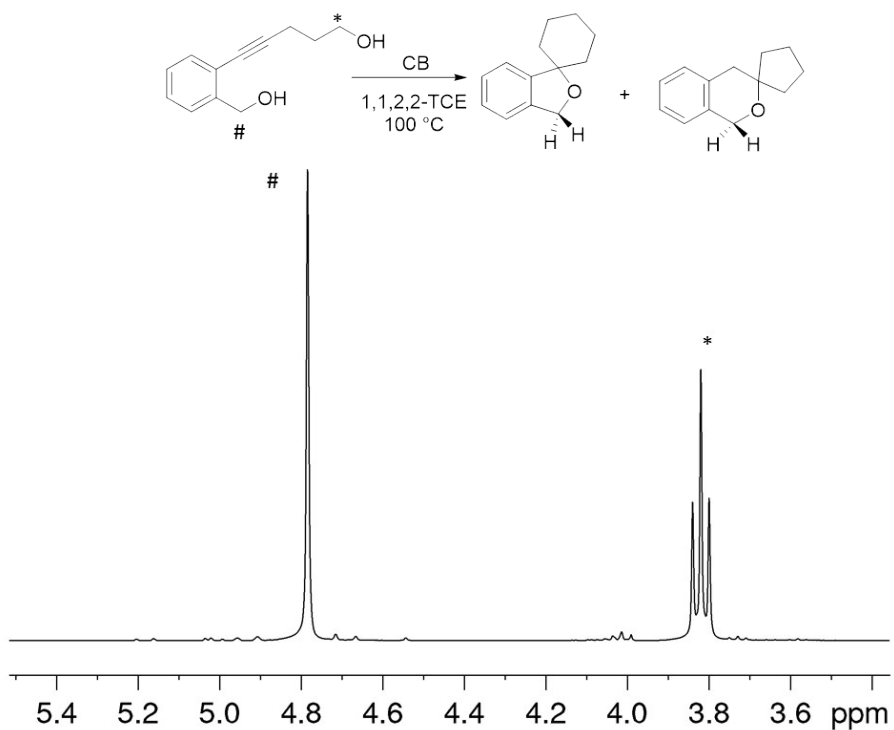

**Figure S15.**  $^1\text{H}$  NMR spectrum of the residues recovered after completion of hydroalkoxylation of 2-(5-hydroxypent-1-ynyl)benzyl alcohol using unmodified carbon black as a catalyst (Table 3, entry 3).

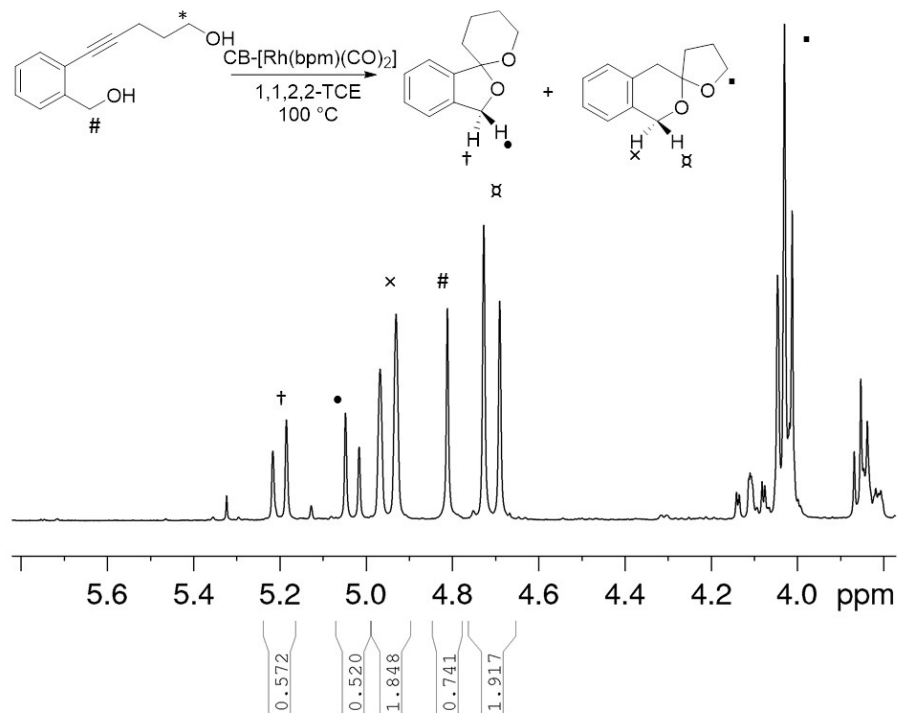

**Figure S16.**  $^1\text{H}$  NMR spectrum of the residues recovered after completion of the second run of hydroalkoxylation of 2-(5-hydroxypent-1-ynyl)benzyl alcohol using  $\text{CB-}[\text{Rh}(\text{bpm})(\text{CO})_2]$  as a catalyst (Table 4, entry 2).

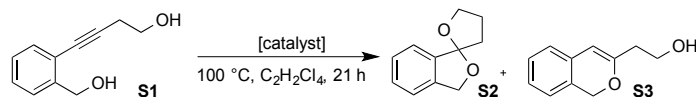

|          | Catalyst (Rh mol%)                                              | Conversion (%) | Ratio <b>S3</b> : <b>S2</b> | TON |
|----------|-----------------------------------------------------------------|----------------|-----------------------------|-----|
| <b>1</b> | $\text{CB-}[\text{Rh}(\text{bpm})(\text{CO})_2]$ (4.6)          | >98            | 3:17                        | 21  |
| <b>2</b> | $\text{CB} + [\text{Rh}(\text{CO})_2\text{Cl}]_2$ (4.6) cycle 1 | 73             | 1:10                        | 16  |
| <b>3</b> | $\text{CB} + [\text{Rh}(\text{CO})_2\text{Cl}]_2$ (4.6) cycle 2 | 30             | 3:17                        | 7   |

**Table S8.** Dihydroalkoxylation of **S1** using heterogeneous and homogeneous  $[\text{Rh}(\text{bpm})(\text{CO})_2]$ -based catalysts.

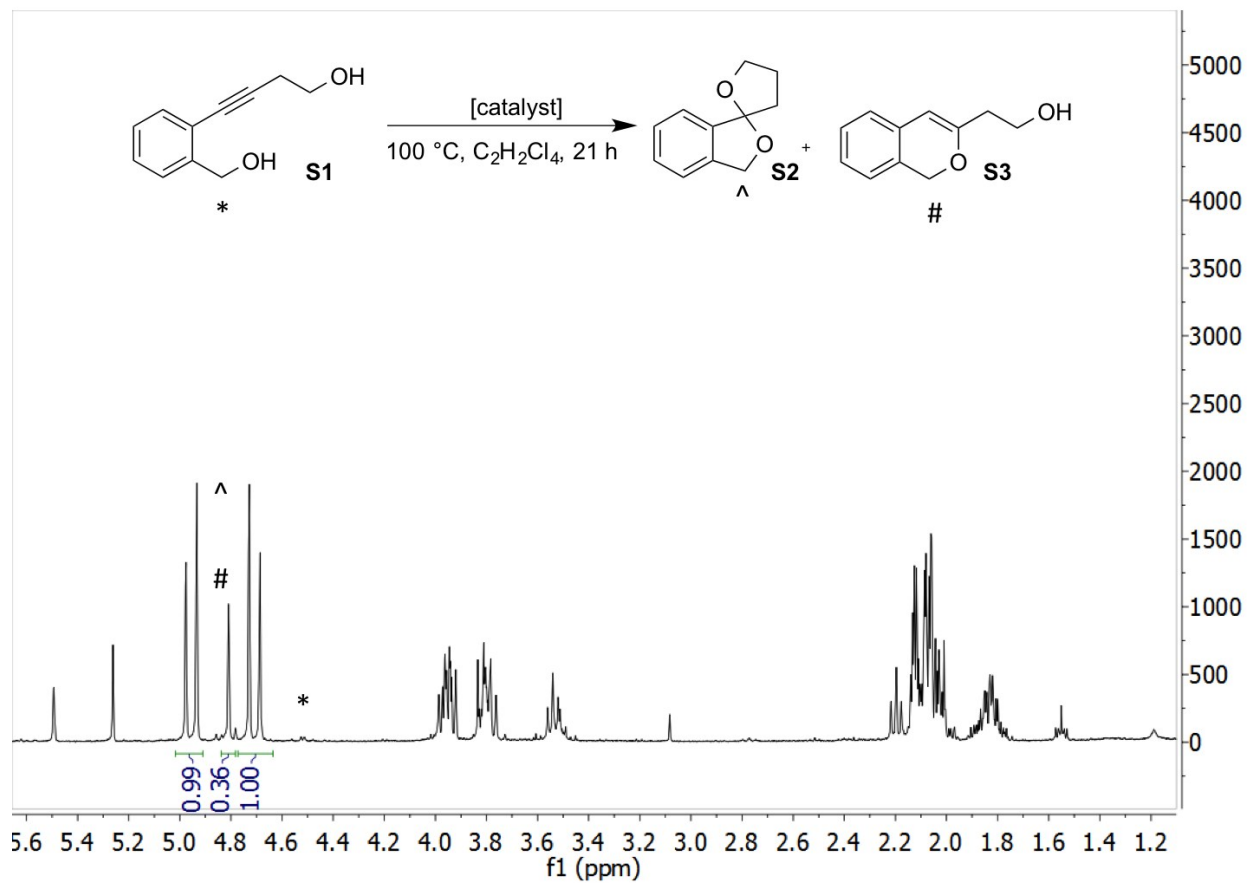

Figure S17 (table S8 entry 1)



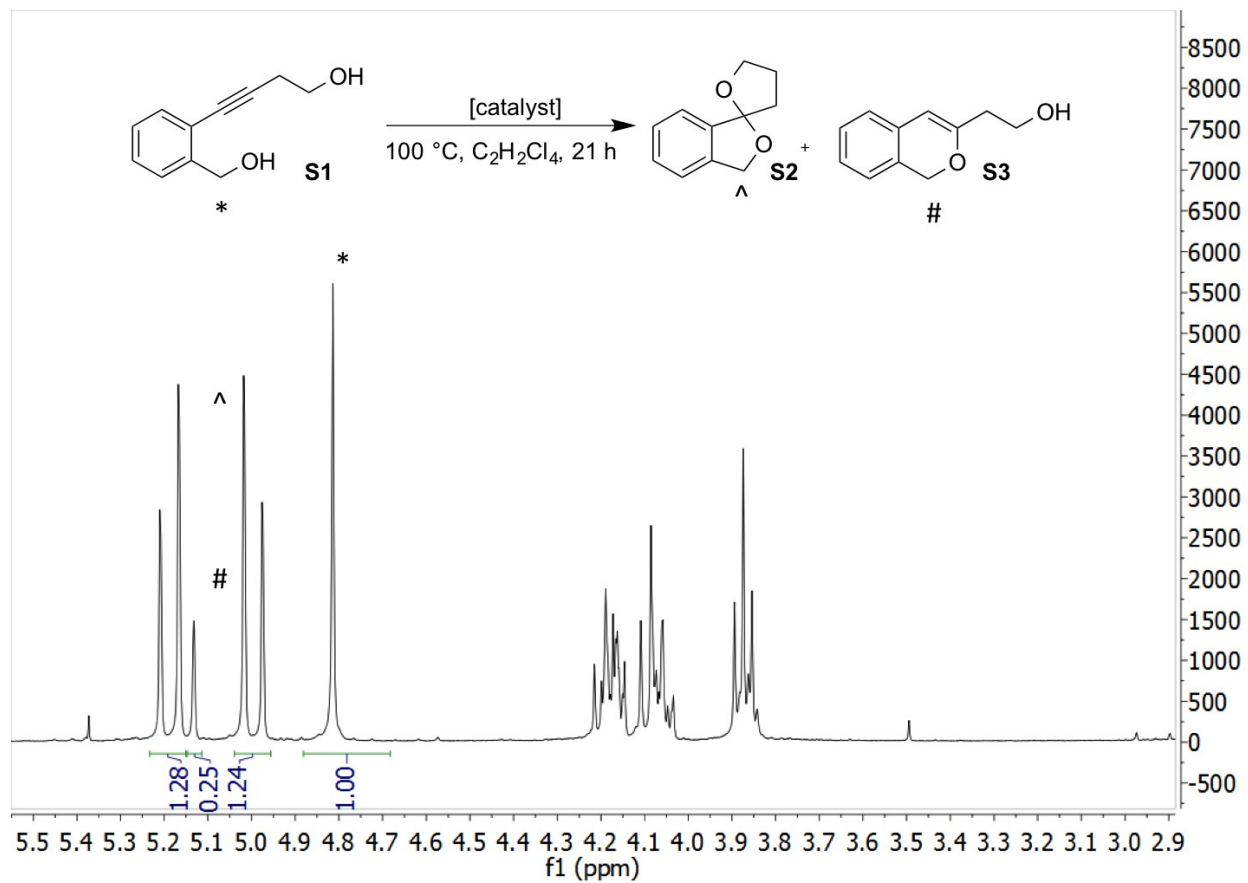

Figure S18 (table S8 entry 2)

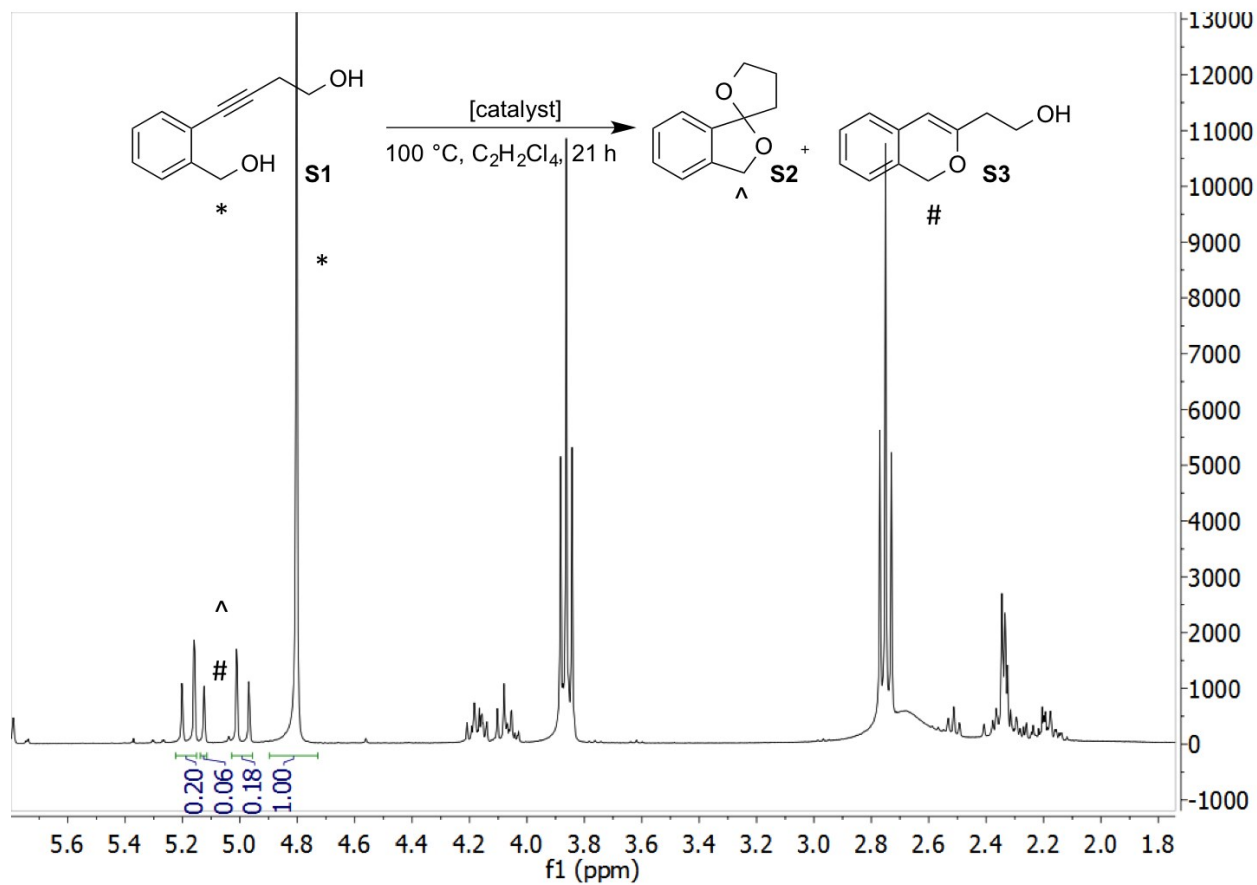

Figure S19 (table S8 entry 3)
